# Supplementary material for: Detection of H5N1 High Pathogenicity Avian Influenza Viruses in Four Raptors and Two Geese in Japan in the Fall of 2022
Source: MDPI journal article supplement (doi:10.3390/v15091865), 2023-09-01
Supplement: s1 [file s1]

**Table S1. Northern Pintail Population in Yatsu-higata or Yatsu Tidal Flat, Chiba Prefecture, Japan.**

|           |        | 2020 | 2021 | 2022 |
|-----------|--------|------|------|------|
| September | Early  | 0    | 0    | 0    |
|           | Middle | 0    | 0    | 0    |
|           | Late   | 0    | 0    | 3    |
| October   | Early  | 0    | 0    | 4    |
|           | Middle | 0    | 31   | 73   |
|           | Late   | 5    | 0    | 102  |
| November  | Early  | 44   | 14   | 214  |
|           | Middle | 16   | 7    | 188  |
|           | Late   | 4    | 305  | 3    |

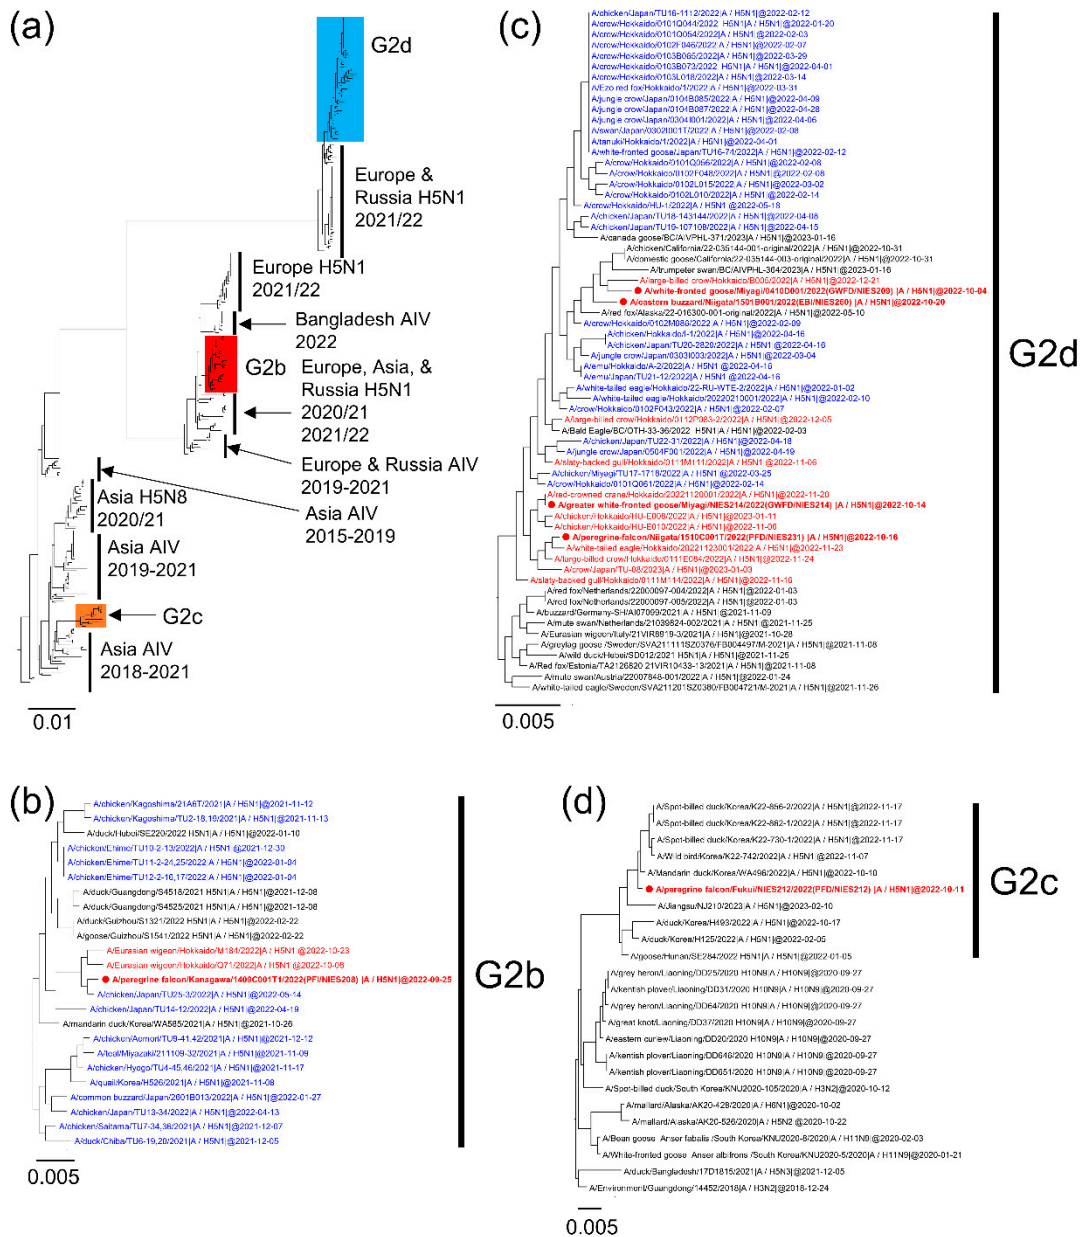

Figure S1. phylogenetic trees of the PB2 gene segment.

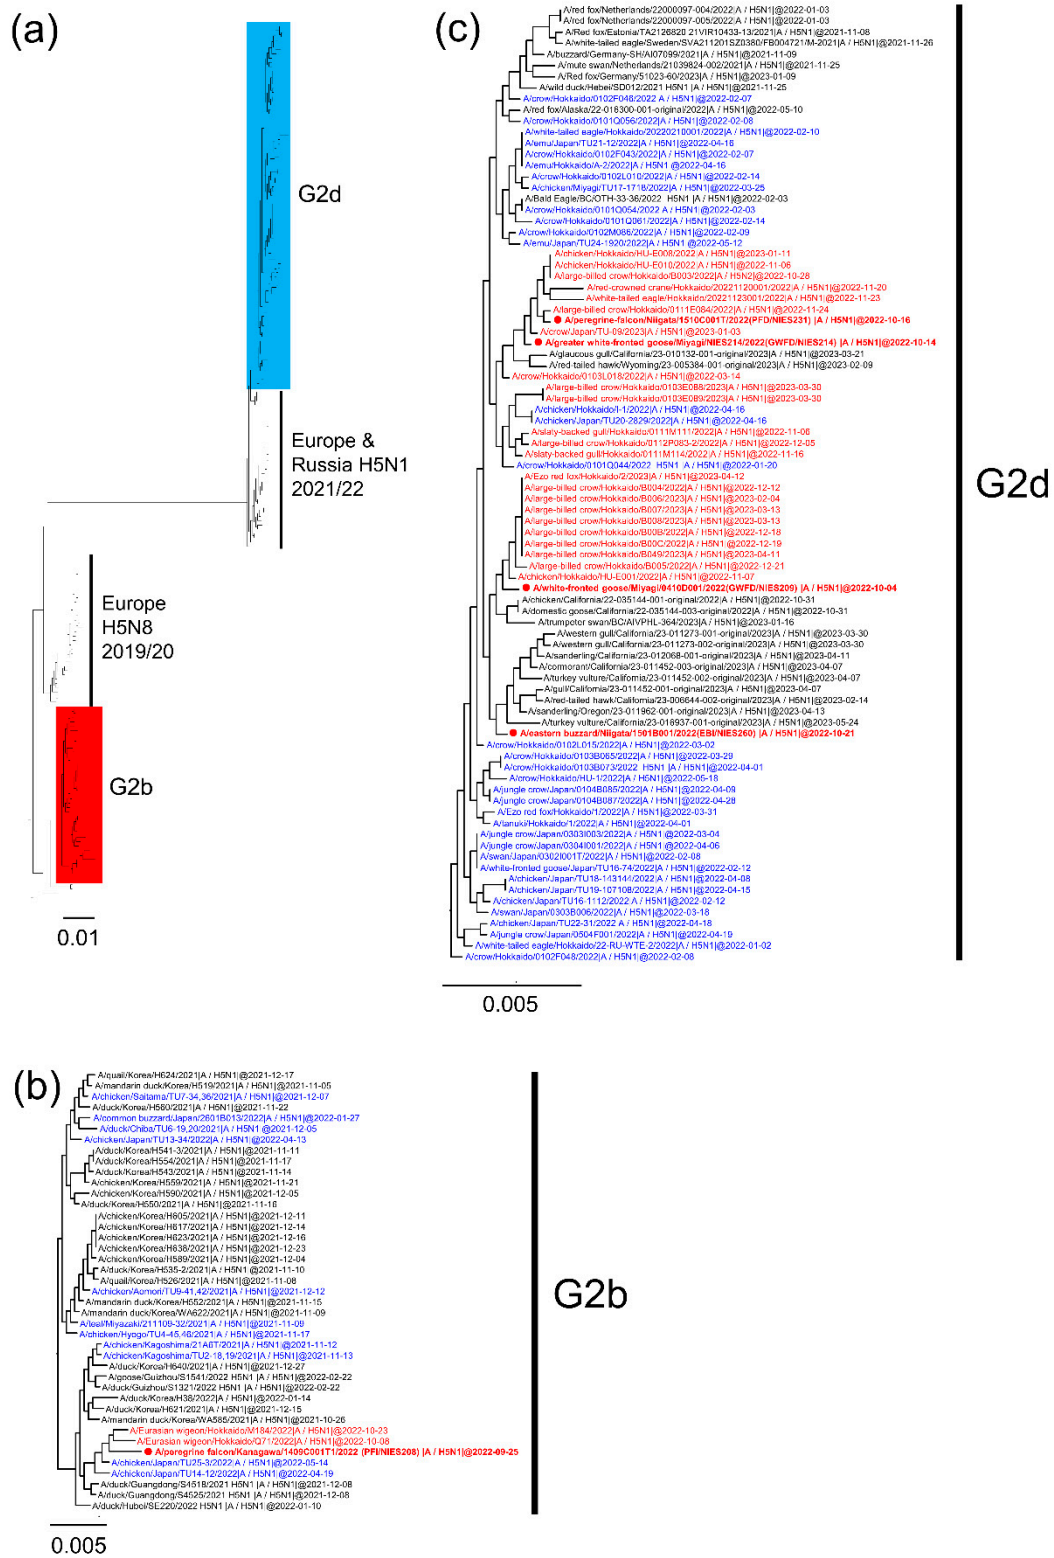

Figure S2. phylogenetic trees of the PB1 gene segment.

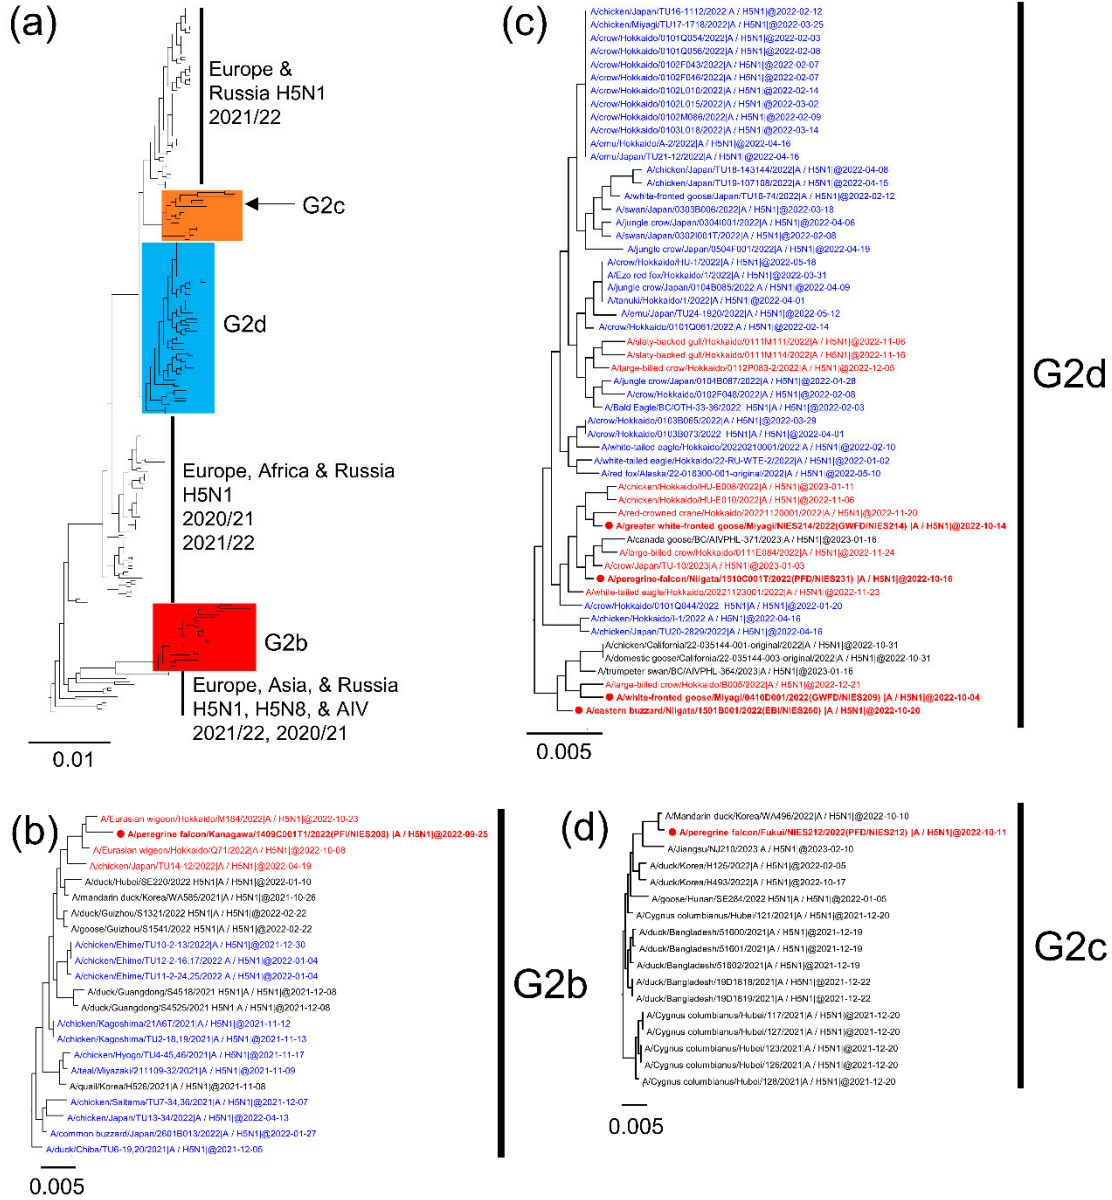

Figure S3. phylogenetic trees of the PA gene segment.

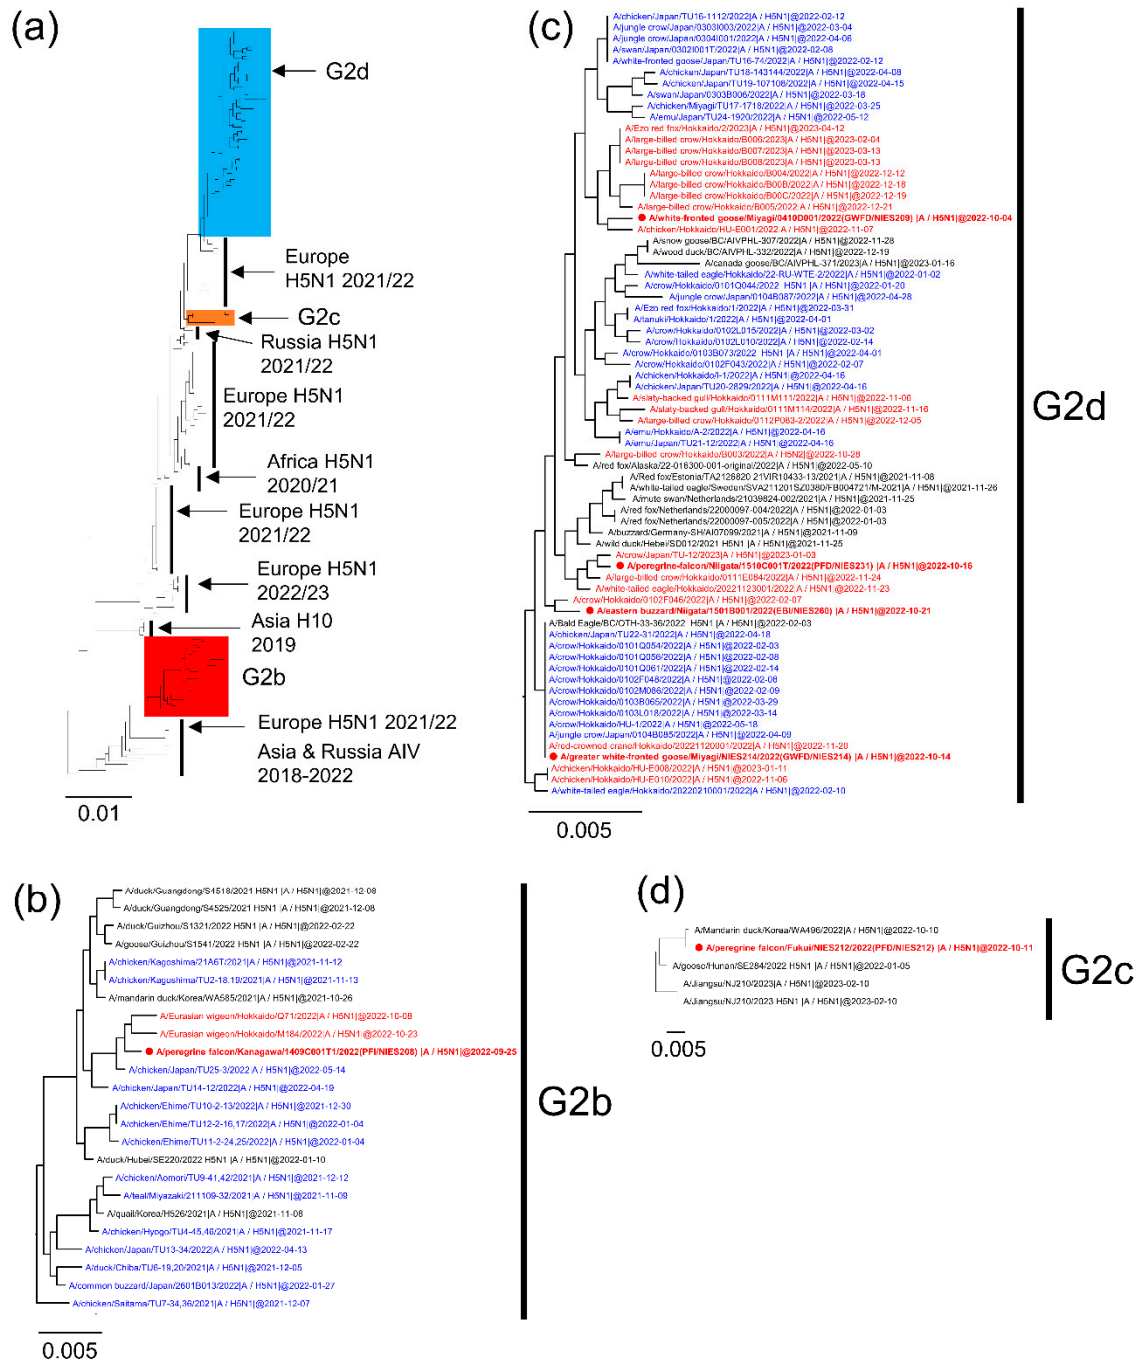

Figure S4. phylogenetic trees of the NP gene segment.



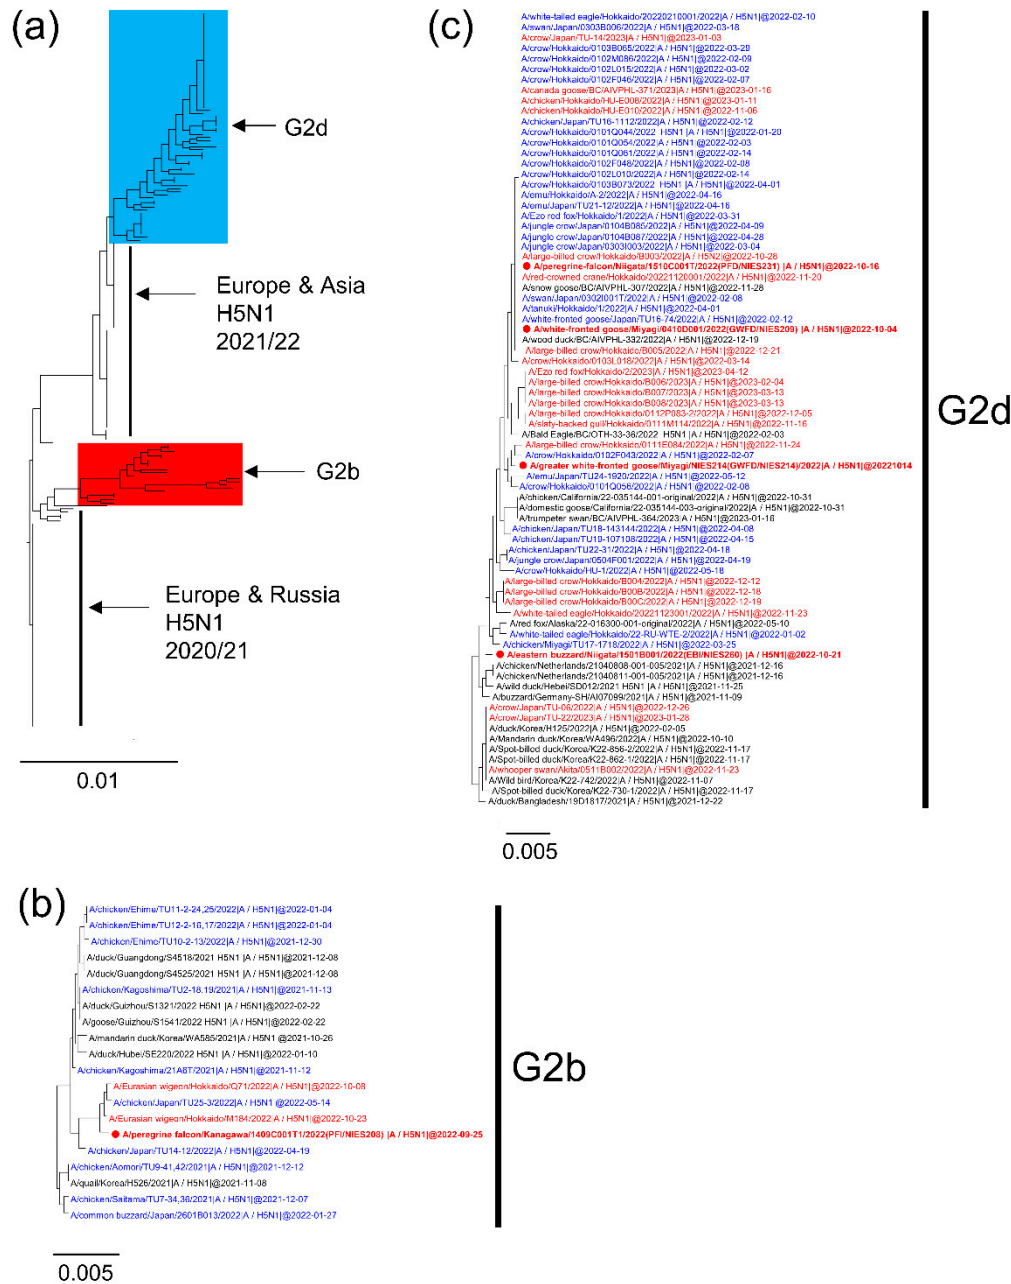

Figure S5. phylogenetic trees of the MP gene segment.

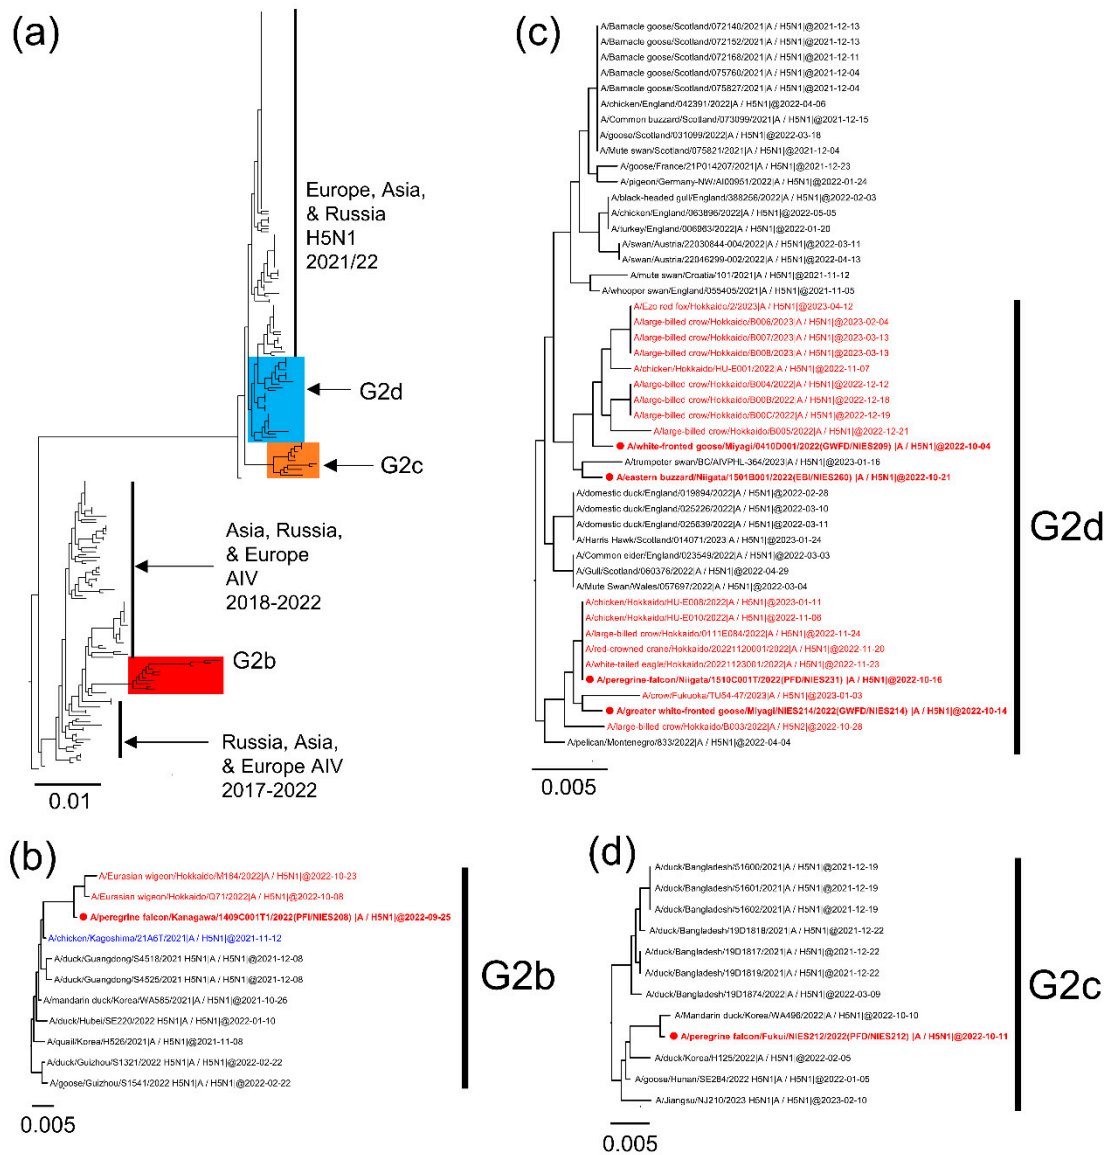

Figure S6. phylogenetic trees of the NS gene segment.
